# Supplementary material for: Membrane-Supported Layered Coordination Polymer as an Advanced Sustainable Catalyst for Desulfurization
Source: MDPI journal article supplement (doi:10.3390/molecules26092404), 2021-04-21
Supplement: s1 [file s1]

# Supporting Information

## Membrane-Supported Layered Coordination Polymer as an Advanced Sustainable Catalyst for Desulfurization

Fátima Mirante<sup>1</sup>, Ricardo F. Mendes<sup>2</sup>, Rui G. Faria<sup>1</sup>, Luís Cunha-Silva<sup>1</sup>,  
Filipe A. Almeida Paz<sup>2</sup> and Salete S. Balula<sup>1</sup>

<sup>1</sup> *REQUIMTE/LAQV & Department of Chemistry and Biochemistry, Faculty of Sciences,  
University of Porto, 4169-007 Porto, Portugal;  
fatimaisabelmirante@gmail.com; up201202396@fc.up.pt; l.cunha.silva@fc.up.pt*

<sup>2</sup> *CICECO - Aveiro Institute of Materials, Department of Chemistry, University of Aveiro, Campus  
Universitário de Santiago, 3810-193 Aveiro, Portugal; rfmendes@ua.pt*

\* *Correspondence: filipe.paz@ua.pt (F.A.A.P.); sbalula@fc.up.pt (S.S.B); rfmendes@ua.pt (R.F.M)*

## Membrane Characterization

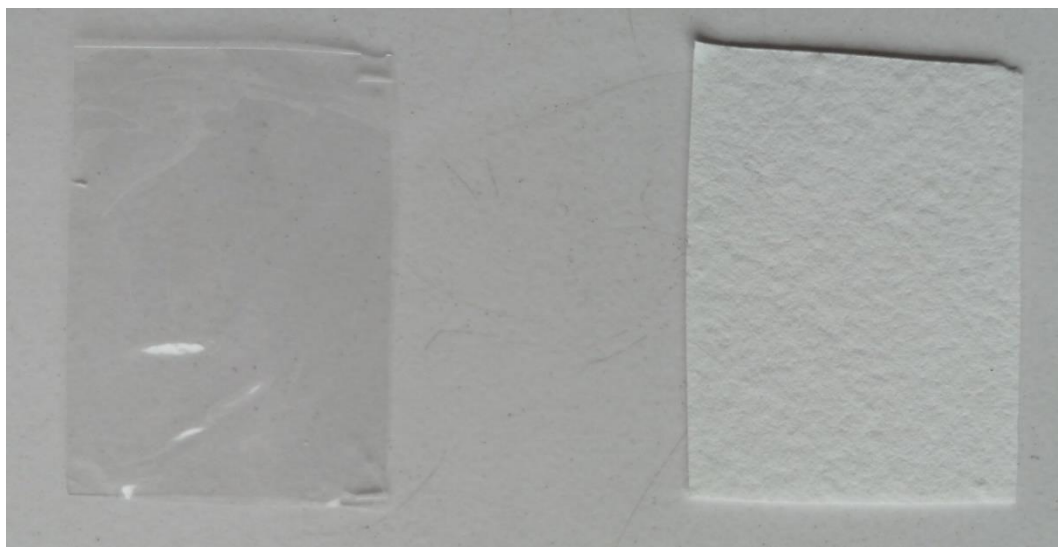

**Figure S1.** Picture of a (*left*) PMMA membrane and of the (*right*) UAV-59@PMMA composite membrane.

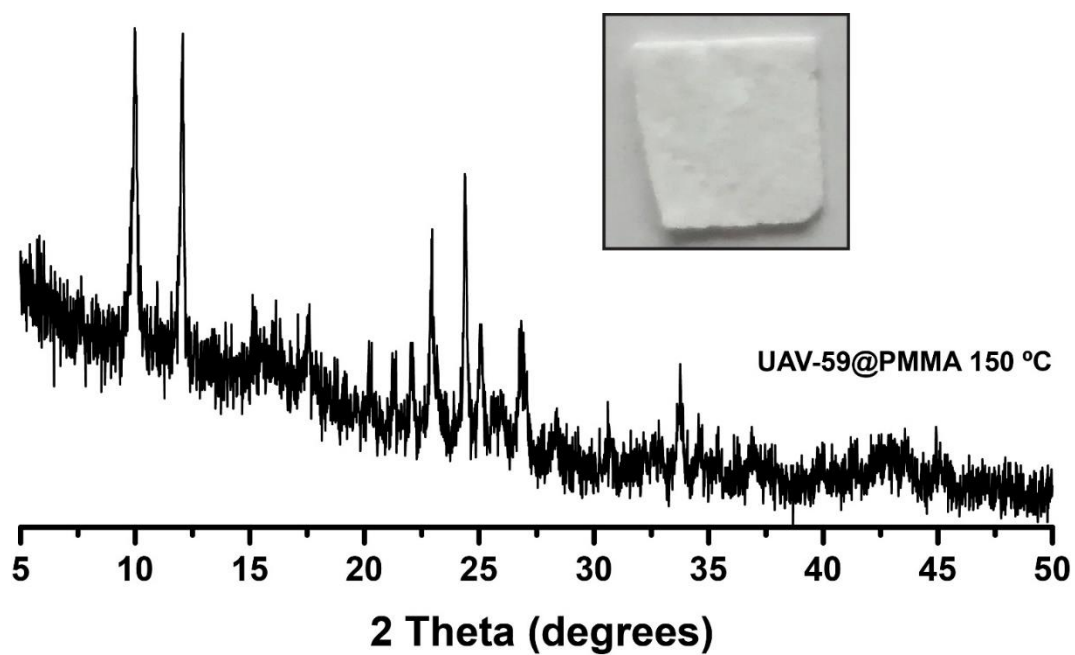

**Figure S2.** Powder X-ray diffraction patterns of the UAV-59@PMMA membrane after 24 h at 150 °C with the corresponding membrane picture on the top.

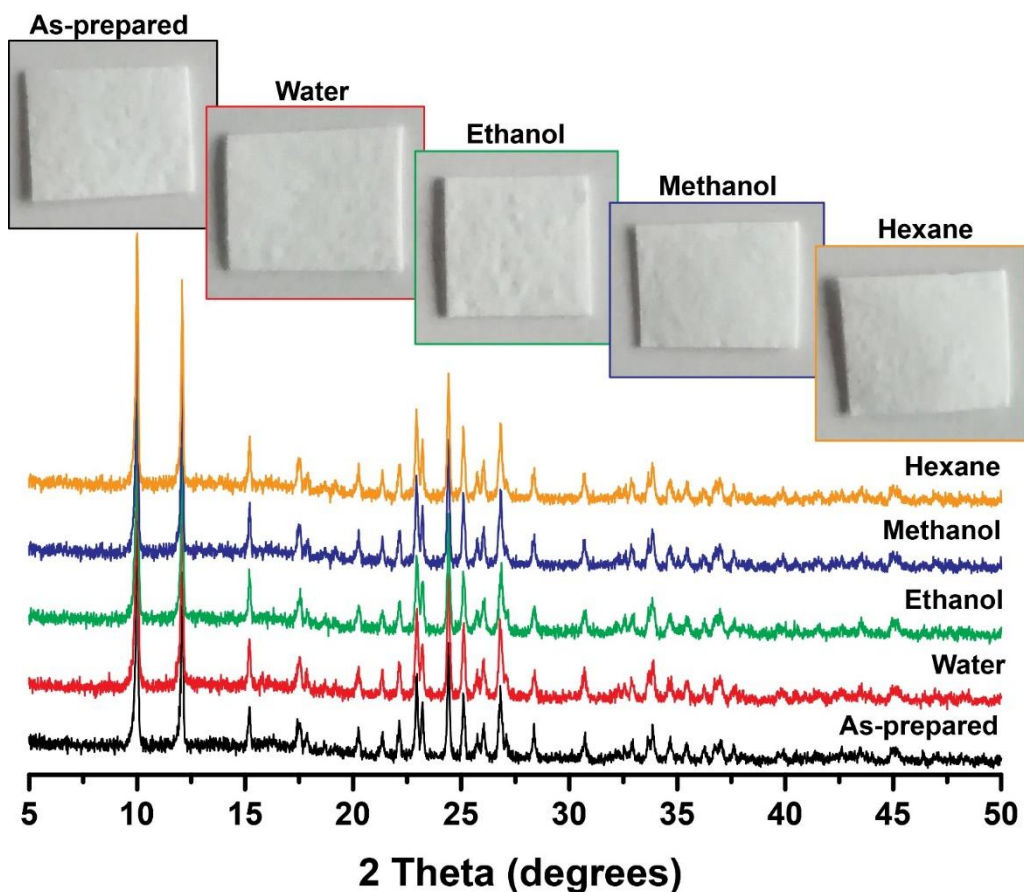

**Figure S3.** Powder X-ray diffraction patterns of the UAV-59@PMMA membranes (membrane pictures on the top) after 24 h immersed in different solvents.

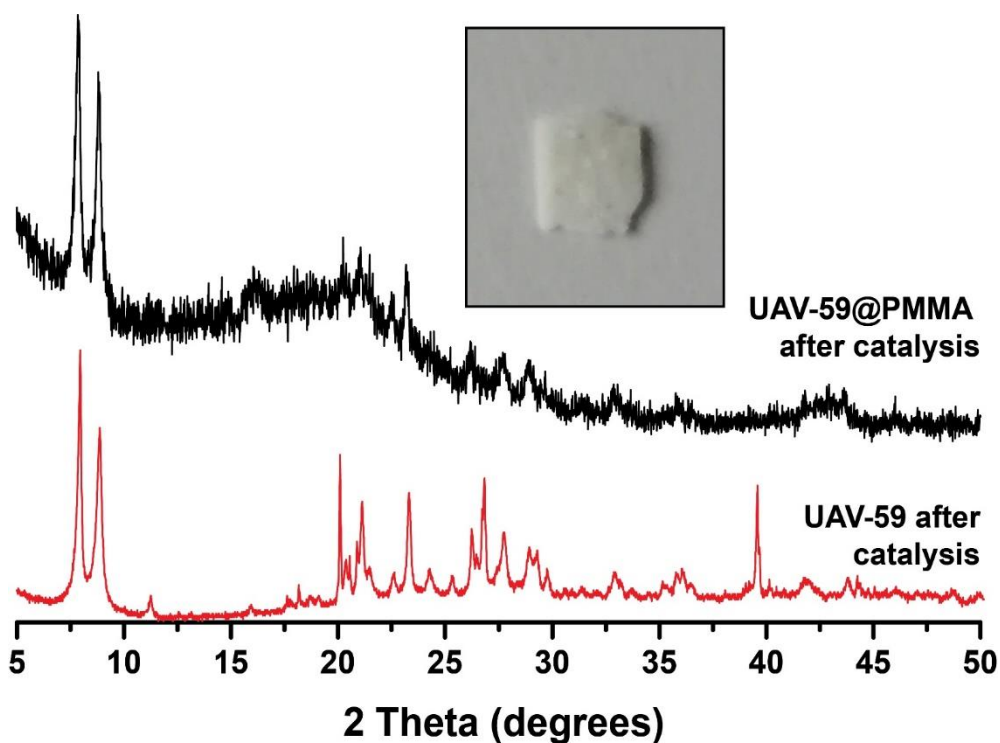

**Figure S4.** Comparison between powder X-ray diffraction patterns of the UAV-59 material in powdered form (**red**) and of the UAV-59@PMMA membrane (**black**) after catalysis. The inset picture pertains to the UAV-59@PMMA membrane after catalysis.
